# Supplementary material
Source: publisher figshare collection journal article supplement (https://frontiersin.figshare.com/ndownloader/files/13784714)

**A**

CD4 total

unstim

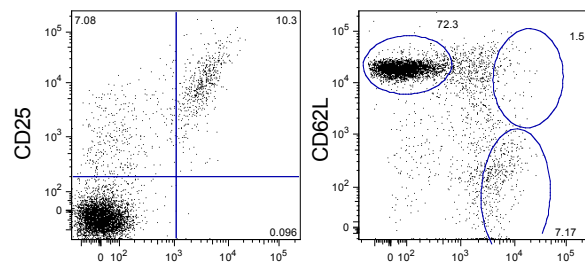

stim  
(anti-CD3  
platebound  
+ CD28)

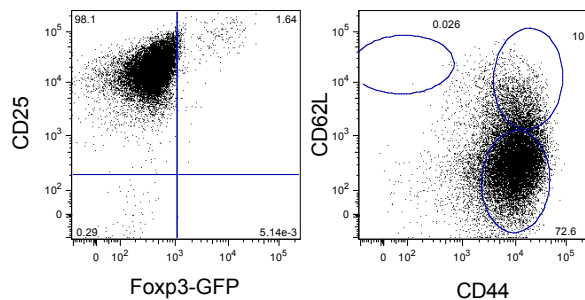**B**

naive T cells

unstim

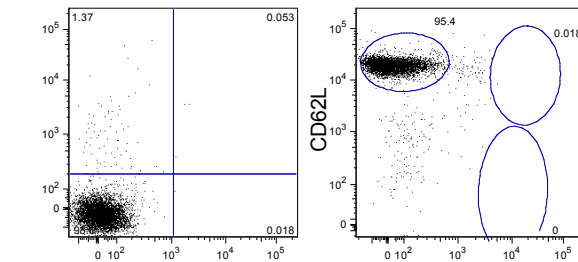

stim  
(anti-CD3  
platebound  
+ CD28)

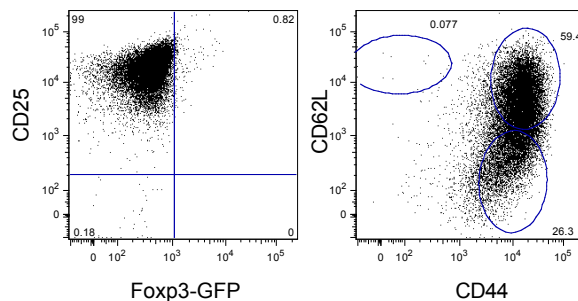**C**

Treg

unstim

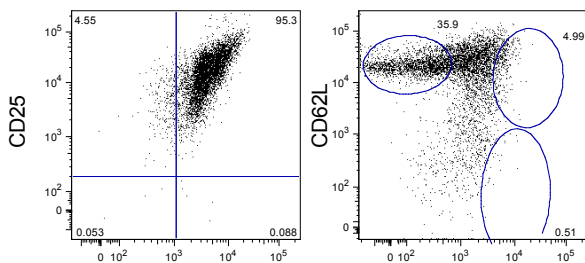

stim  
(anti-CD3  
platebound  
+ CD28)

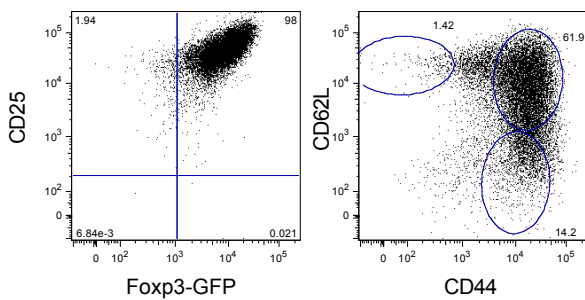

Supplement: Supplementary file [file 13784714]
